# Supplementary material for: Comparative Studies of Bioactivities and Chemical Components in Fresh and Black Garlics
Source: Preprints.org preprint supplement (doi:10.20944/preprints202403.1563.v1), 2024-03-26
Supplement: Supplementary file 1 [file supplementary]

## Sheet: Table S5
Supplementary Table S5. Amino acid and sugar contents of fresh and black garlic
		Amino acid contents (mg･100gFW -1)																																		Sugar contents (g･100gFW -1)
	Materials	Phosphoserine	Taurine	Phosphoethanolamine	Asp	Hydroxyproline	Thr	Ser	Asn	Glu	Gln	Pro	Gly	Ala	Citrulline	2-Aminobutyric Acid	Val	(Cys)2	Met	Ile	Leu	Cystathionine	Tyr	Phe	β-Alanine	3-Aminoisobutyric Acid	4-Aminobutyric Acid	Trp	His	3-Methylhistidine	Anserine	Hydroxylysine	Ornithine	Lys	Arg	Fructose	Glucose	Sucrose	Fructan
Fresh garlic	White-roppen' 2018-1	5.43414	3.1677	1.08154	16.6883	54.9741	7.82901	8.89922	704.413	nd	47.3684	82.9274	3.57432	32.0858	nd	nd	4.72703	2.43105	2.15347	2.57854	1.21277	nd	7.42659	13.0406	0.277109	0.422587	18.2514	nd	20.6053	nd	nd	1.08594	16.6773	114.763	1444.45	0.209667	0.150873	0.591687	14.8811
	White-roppen' 2018-2	nd	1.98335	0.369351	11.1294	nd	7.18094	10.506	36.4987	nd	20.3748	65.8489	3.93578	23.5805	nd	nd	5.54153	1.24602	2.36849	2.83998	0.880597	nd	8.14149	13.1561	0.292165	0.326667	16.8433	nd	15.2265	nd	nd	0.231934	7.37112	72.6373	583.58	0.282497	0.136982	0.579152	18.4592
	White-roppen' 2018-3	nd	1.28237	0.416427	12.0005	21.4687	7.73753	8.10321	336.495	nd	30.1476	73.1081	3.15752	22.587	nd	nd	3.36957	1.37106	3.5212	2.5164	0.640647	nd	4.29388	12.5659	0.191422	0.311871	19.4244	nd	14.8103	nd	nd	0.240315	12.0169	86.4475	1233.4	0.212553	0.162087	0.636355	8.55966
	White-roppen' 2018-4	nd	1.75355	0.380571	13.7781	15.3863	8.2114	10.6753	319.691	nd	35.7643	66.6238	3.77401	22.9543	nd	nd	5.834	2.06264	2.40577	2.66469	0.552951	nd	12.8815	16.6119	0.263251	nd	16.686	nd	14.5717	nd	nd	0.465762	8.50685	77.908	632.671	0.234416	0.0741936	0.634795	9.43028
	White-roppen' 2018-5	2.77358	1.63864	0.322597	13.2617	15.2349	7.7216	12.5168	173.049	73.8479	41.3316	67.4724	3.38143	18.787	nd	nd	4.74987	9.72891	3.12737	2.77014	0.940594	nd	7.20674	12.6093	0.200013	0.308393	13.1719	nd	15.0776	nd	nd	0.4776	9.8059	80.2708	858.621	0.186066	0.142126	0.634272	7.93929
	White-roppen' 2019-1	3.09982	nd	0.0871269	25.1825	23.8207	7.5099	14.2	195.91	87.0315	89.8885	64.0334	1.53231	8.95196	nd	nd	4.9604	6.52714	1.43446	1.62227	0.248774	nd	2.08554	5.82897	0.235646	0.19033	1.40499	nd	7.26098	nd	nd	2.02957	34.7223	55.1738	872.673	0.0316866	0.0900143	0.460117	16.877
	White-roppen' 2019-2	3.36894	0.737914	0.0935191	24.4158	24.9478	8.2334	14.537	211.865	84.9437	89.1226	66.313	1.72922	8.90552	nd	nd	5.82258	7.95207	1.31756	1.63193	0.193352	nd	1.8172	4.54611	0.248196	0.168744	1.43059	nd	6.14467	nd	nd	1.86762	38.3323	56.7117	921.827	0.043511	0.0366634	0.690159	19.5095
	White-roppen' 2019-3	3.67877	1.13551	0.0927436	23.3302	21.9197	7.86318	15.9285	178.176	87.5426	88.5161	71.347	1.76752	11.4142	nd	nd	5.27952	6.81646	1.4639	1.53988	0.167691	nd	1.91796	6.85802	0.283761	0.168744	1.53527	nd	6.03243	nd	nd	1.93735	40.7793	58.5114	880.043	0.0538682	0.085517	0.533962	13.7996
	Iki-ooninnniku'-1	1.59702	nd	0.0906575	28.4353	26.3495	7.13847	29.272	543.779	nd	7.0584	90.8205	2.29524	11.0653	nd	25.9756	11.974	7.8801	nd	2.43137	nd	nd	0.944369	4.80593	0.372171	0.121233	0.348342	nd	11.4677	nd	nd	0.43906	9.29735	69.1161	1315.49	0.110728	0.035802	0.658275	12.4744
	Iki-ooninnniku'-2	2.24326	nd	0.0932623	30.0351	22.7311	6.87245	29.1455	543.179	nd	8.08566	91.3441	2.40955	11.8702	nd	22.1119	12.0616	7.24395	nd	2.52427	nd	nd	0.981173	4.1346	0.370943	0.1185	0.357124	nd	10.2108	nd	nd	0.337727	8.77536	63.794	1329.82	0.0267934	0.0464005	0.704676	18.5954
	Chile-60'	1.56205	nd	0.312705	24.5139	nd	4.21335	18.0505	195.644	82.3991	2.6411	61.3111	1.56555	12.2309	nd	nd	2.19206	6.05505	nd	1.14374	nd	nd	nd	4.75513	0.196765	nd	0.354751	nd	3.93518	nd	nd	0.3735	21.6306	40.6369	949.378	0.0189486	0.451831	0.694344	18.3688
	Spain-225'	3.96271	0.302772	0.345185	23.8867	73.305	8.85336	35.5397	579.782	nd	nd	69.6519	2.3756	18.8721	12.4166	29.5488	20.0599	10.7182	nd	2.97548	0.300922	nd	4.52959	3.17415	0.430446	0.493932	0.415075	nd	16.9512	nd	nd	3.09758	45.7394	66.267	1233.76	0.069374	0.153629	0.6834	13.5742
Black garlic	White-roppen' 2018-1	71.595	nd	8.12958	26	nd	3.02849	10.4599	24.7232	14.8216	nd	17.6249	63.5444	59.9675	nd	nd	7.31931	16.4194	2.93462	2.69919	nd	nd	29.4104	13.4193	0.464374	nd	3.28719	nd	0.812427	nd	nd	21.2795	2.25609	12.9022	152.143	29.7679	1.9847	0.0921217	3.17771
	White-roppen' 2018-2	49.7725	nd	4.42978	16.7821	nd	5.28695	14.5668	52.1785	21.1337	nd	17.1341	49.4198	35.7165	nd	nd	9.15283	4.26924	5.86267	4.1107	nd	nd	42.0577	12.793	0.776966	nd	2.96147	nd	3.27376	nd	1.11218	17.2804	3.22836	33.5058	351.819	26.0083	1.93845	1.89629	2.80453
	White-roppen' 2018-3	61.5279	nd	9.17922	18.9677	nd	5.20011	16.0374	63.0655	23.7658	nd	10.2761	50.8768	35.8191	nd	nd	9.95165	5.67111	7.38297	3.78329	0.226079	nd	42.0763	16.5119	0.641398	nd	3.08811	nd	3.40133	0.262736	1.24877	23.086	2.32349	38.2438	360.426	25.7758	2.03082	1.09173	1.92561
	White-roppen' 2018-4	79.175	nd	11.4434	24.0538	nd	3.28024	12.6648	15.694	12.7965	nd	10.7972	61.3863	55.5867	nd	nd	8.50663	15.934	5.04386	3.09605	nd	nd	32.2488	15.2733	0.478527	nd	2.91115	nd	0.759066	nd	nd	19.2862	1.94535	17.2842	123.32	38.8527	2.75268	0.111937	3.20097
	White-roppen' 2018-5	71.5933	nd	7.80771	18.9187	nd	5.93087	35.9881	46.157	19.6531	nd	12.7957	49.4523	46.725	nd	nd	10.8774	4.18364	4.98407	3.32399	nd	nd	33.019	12.4422	0.580323	nd	2.44617	nd	0.650393	nd	0.38625	22.7926	nd	24.9469	252.42	30.0816	1.38541	1.53207	4.11722
	White-roppen' 2019-1	121.328	30.7231	16.5077	49.152	nd	3.70095	10.11	12.8897	5.1021	nd	78.2458	66.807	101.25	nd	nd	16.3022	nd	3.61085	5.74063	nd	nd	41.1693	20.0644	0.280186	nd	10.7603	nd	0.547045	nd	nd	12.6265	nd	10.9327	86.5726	42.5807	1.90112	0.694255	4.18998
	White-roppen' 2019-2	111.642	nd	12.9706	34.0594	nd	4.20169	8.99791	41.0473	17.5092	nd	70.9696	78.1105	114.991	nd	nd	13.3275	22.6436	3.61025	5.37441	1.74311	nd	61.8481	18.5398	0.319853	nd	12.4315	nd	3.89678	3.0341	0.453779	39.4152	3.13308	19.4868	300.906	44.197	1.22221	0.809787	4.87965
	Black garlic M-1	48.2325	nd	2.38305	35.6922	nd	6.41788	14.7435	12.2875	nd	5.01828	43.745	47.5786	0	nd	nd	21.8321	6.53414	8.62188	10.6028	nd	59.4005	69.7226	13.0754	0.845526	nd	22.1268	nd	0.736288	nd	0.56101	15.2322	1.7364	21.2049	130.508	28.6096	2.7365	0.929831	1.98896
	Black garlic M-2	80.5503	nd	10.0612	40.362	nd	4.33365	8.75572	23.227	11.6612	nd	37.4642	103.022	103.396	nd	nd	15.2475	72.1592	14.4146	6.74578	8.80067	nd	76.4222	9.14538	1.5897	nd	7.03737	0.822893	0.35328	nd	0.660019	10.6586	nd	12.6576	109.794	27.0077	1.92651	0.507446	3.38449
	Black garlic M-3	103.718	nd	10.1229	44.5945	nd	6.18605	14.9877	27.0102	9.03436	nd	56.2027	76.79	105.238	nd	nd	23.8077	78.5613	10.1669	11.1651	17.0921	nd	85.785	12.7538	0.902913	nd	18.1325	nd	0.651299	nd	0.655265	20.8285	2.03256	14.7341	171.733	29.6978	3.09369	0.586362	1.97398
	Black garlic M-4	118.001	nd	9.22052	38.3878	nd	4.56637	8.891	22.9577	12.3057	nd	40.389	98.2227	106.767	nd	nd	15.2573	65.8909	14.1275	6.75948	9.13773	nd	77.3934	9.69313	1.59642	nd	8.95379	0.968184	0.376313	nd	0.681712	10.0661	1.26658	14.9758	138.194	31.631	2.17667	0.760362	2.74248
	Black garlic M-5	114.797	nd	10.7732	49.6962	nd	7.73798	18.0306	38.0337	12.8024	5.87009	64.8393	86.7736	122.479	nd	nd	26.6324	88.1321	11.9521	12.714	20.1536	nd	101.39	15.5814	1.06548	nd	22.0513	nd	0.961344	nd	0.778447	18.4304	2.88693	21.4044	242.035	24.0598	2.09458	0.784875	2.34751
	Black Garlic 2018-1	158.935	nd	21.0032	29.8876	nd	5.69105	12.0002	77.2734	39.8725	nd	63.94	75.6863	110.864	nd	nd	8.89487	9.9242	4.28957	4.80263	6.92219	nd	79.3335	36.8147	0.634809	nd	5.1381	4.94621	1.91515	2.00256	4.73364	41.0385	5.4144	31.7037	580.174	29.1007	0.268531	1.05414	3.50121
	Black Garlic 2018-2	163.608	nd	19.6496	22.9868	nd	4.7597	11.3383	28.8667	6.94225	nd	57.3178	90.2978	108.423	nd	nd	6.42593	91.2863	5.37064	3.98058	5.48753	nd	76.6532	35.7028	0.551565	nd	5.13546	0.589881	2.04984	0.714343	3.91784	27.9369	4.21945	29.3771	505.236	27.4059	0.183138	1.14946	3.76667
	Black Garlic 2018-3	155.766	nd	14.2638	29.2702	nd	4.8765	10.2138	24.5115	5.8816	nd	58.9645	64.0394	98.2532	nd	nd	7.64464	7.81666	3.35702	4.24432	7.34241	nd	69.6137	34.7509	0.497871	nd	4.14946	0.61642	1.58082	1.85076	4.51885	34.862	2.4558	23.062	440.681	30.6548	0.153281	0.737728	3.6195
	Black Garlic 2019-1	113.029	nd	11.8402	23.7573	nd	6.40461	13.9936	53.5747	34.3795	4.77173	205.38	88.7024	89.0495	nd	nd	5.25441	9.55875	9.25085	5.532	8.48979	nd	123.246	58.9799	1.18338	nd	6.32793	0.868281	7.62983	0.655685	4.79974	48.6367	11.1711	65.0695	903.725	28.1559	2.51002	1.28779	3.90216
	Black Garlic 2019-2	162.934	nd	18.304	34.2881	nd	6.38668	17.0507	48.402	44.9865	6.26835	161.123	87.5373	108.44	nd	nd	16.388	77.3091	11.7374	8.1569	8.31871	nd	136.731	61.225	1.00298	nd	5.57972	0.983873	2.54868	0.865548	5.19135	49.0774	8.6312	42.1023	593.381	31.5192	0.74761	0.426108	3.02949
	Black Garlic 2019-3	185.219	nd	19.4367	31.5843	nd	5.76972	13.0456	57.2218	48.3441	5.0525	310.851	98.055	112.009	nd	nd	7.51533	169.955	8.54354	7.165	9.04309	nd	146.376	65.1151	1.13451	nd	5.52578	0.779956	6.6544	1.1121	5.91775	55.101	10.8015	51.5796	827.078	26.3961	0.556711	0.438799	2.92754
